# Supplementary material for: Poly(Sulfobetaine Methacrylate-co-Vinyl Pyrrolidone) Hydrogels as Potential Contact Lenses Delivery Systems for Timolol Maleate
Source: MDPI journal article supplement (doi:10.3390/gels9020114), 2023-01-30
Supplement: s1 [file s1]

## Supplementary Information

**Table S1.** Chemical formulas of the reagents used within the study along with their role.

| Name of the reagent                                                                               | Role of the reagent       | Chemical formula                                                                                  |
|---------------------------------------------------------------------------------------------------|---------------------------|---------------------------------------------------------------------------------------------------|
| [2-(Methacryloyloxy)ethyl]dimethyl-(3-sulfopropyl)ammonium hydroxide<br>Sulfobetaine methacrylate | Monomer                   | 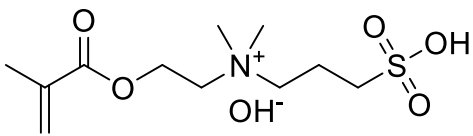                |
| <i>N</i> -Vinyl pyrrolidone                                                                       | Monomer                   |                |
| Potassium persulfate                                                                              | Initiator                 | $2 K^+ \begin{array}{c} O \\    \\ O^- - S - O - S - O^- \\    \quad    \\ O \quad O \end{array}$ |
| Poly(ethylene glycol diacrylate)                                                                  | Crosslinking agent        |               |
| Timolol maleate                                                                                   | Drug for glaucoma therapy |               |

# Thermal properties of (pSB-co-pVP) networks as studied by DSC

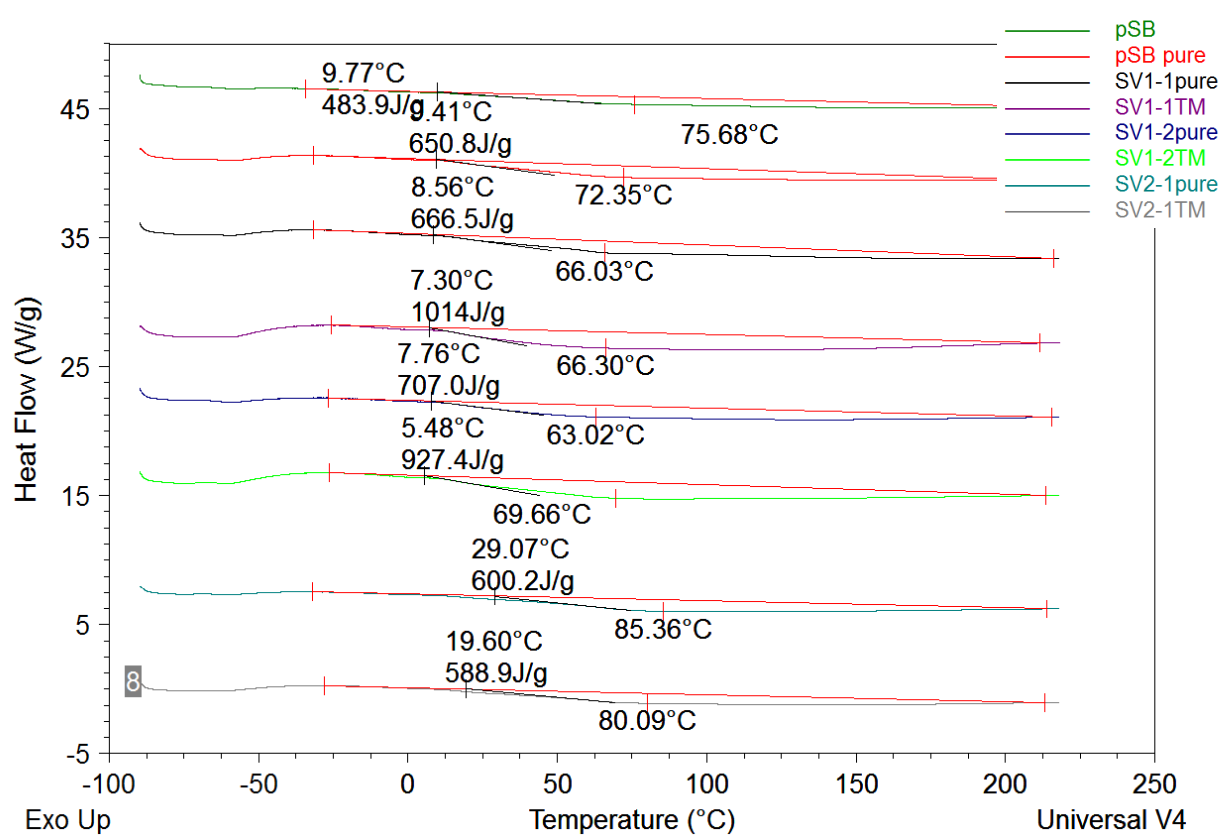

**Figure S1.** DSC thermograms (1<sup>st</sup> heating run) for neat and TM loaded copolymeric networks as well as for the neat and TM loaded pSB network.

## Overall ANOVA analysis for TM entrapment efficiency (EE) in pSB-co-pVP hydrogels

One-way ANOVA and Tukey Tukey post hoc test were performed using OriginPro 2018 software (OriginLab Corporation, [www.originlab.com](http://www.originlab.com)).

The overall ANOVA analysis was applied for the entrapment efficiency data (Figure 2a) and the results are presented in Table S2.

**Table S2.** Overall ANOVA analysis of the entrapment efficiency (EE) data, presented in Figure 2a.

|       | DF | Sum of Squares | Mean Square | F Value | Prob>F  |
|-------|----|----------------|-------------|---------|---------|
| Model | 3  | 79,76437       | 26,58812    | 0,92032 | 0,44177 |
| Error | 33 | 953,37472      | 28,89014    |         |         |
| Total | 36 | 1033,13908     |             |         |         |

At the 0.05 level, the population means are **not** significantly different.

**Table S3.** Tukey post hoc test for the entrapment efficiency (EE) data, presented in Figure 2a.

|             | MeanDiff | SEM     | q Value | Prob    | Alpha | Sig* | LCL       | UCL     |
|-------------|----------|---------|---------|---------|-------|------|-----------|---------|
| SV1-1 SV1-2 | -1,05113 | 2,29189 | 0,6486  | 0,96746 | 0,05  | 0    | -7,25057  | 5,14831 |
| SV2-1 SV1-2 | -2,99977 | 2,34849 | 1,80641 | 0,58344 | 0,05  | 0    | -9,35231  | 3,35276 |
| SV2-1 SV1-1 | -1,94864 | 2,34849 | 1,17344 | 0,83996 | 0,05  | 0    | -8,30118  | 4,40389 |
| pSB SV1-2   | -4,00203 | 2,89904 | 1,95228 | 0,52012 | 0,05  | 0    | -11,84377 | 3,83971 |
| pSB SV1-1   | -2,9509  | 2,89904 | 1,43951 | 0,74023 | 0,05  | 0    | -10,79264 | 4,89084 |
| pSB SV2-1   | -1,00226 | 2,94398 | 0,48146 | 0,98618 | 0,05  | 0    | -8,96558  | 6,96107 |

\*Sig equals 1 indicates that the difference of the means is significant at the 0.05 level. Sig equals 0 indicates that the difference of the means is not significant at the 0.05 level.

## Overall ANOVA analysis for drug loading capacity (DLC) of pSB-co-pVP hydrogels

The overall ANOVA analysis was applied for the DLC data (Figure 2b) and the results are presented in Table S4.

**Table S4.** Overall ANOVA analysis of the drug loading capacity (DLC) data, presented in Figure 2b.

|       | <b>DF</b> | <b>Sum of Squares</b> | <b>Mean Square</b> | <b>F Value</b> | <b>Prob&gt;F</b> |
|-------|-----------|-----------------------|--------------------|----------------|------------------|
| Model | 3         | 0,11715               | 0,03905            | 4,04443        | 0,01461          |
| Error | 34        | 0,32828               | 0,00966            |                |                  |
| Total | 37        | 0,44544               |                    |                |                  |

At the 0.05 level, the population means are significantly different.

**Table S5.** Tukey post hoc test for the drug loading capacity (DLC) data, presented in Figure 2b.

|             | <b>MeanDiff</b> | <b>SEM</b> | <b>q Value</b> | <b>Prob</b> | <b>Alpha</b> | <b>Sig*</b> | <b>LCL</b> | <b>UCL</b> |
|-------------|-----------------|------------|----------------|-------------|--------------|-------------|------------|------------|
| SV1-1 SV1-2 | -0,04071        | 0,0419     | 1,37424        | 0,76627     | 0,05         | 0           | -0,15388   | 0,07245    |
| SV2-1 SV1-2 | -0,12035        | 0,0419     | 4,06204        | 0,03357     | 0,05         | 1           | -0,23351   | -0,00719   |
| SV2-1 SV1-1 | -0,07963        | 0,0419     | 2,6878         | 0,24684     | 0,05         | 0           | -0,19279   | 0,03353    |
| pSB SV1-2   | -0,1431         | 0,053      | 3,81861        | 0,05007     | 0,05         | 0           | -0,28624   | 3,37446E-5 |
| pSB SV1-1   | -0,10239        | 0,053      | 2,73218        | 0,23407     | 0,05         | 0           | -0,24553   | 0,04075    |
| pSB SV2-1   | -0,02276        | 0,053      | 0,60729        | 0,97302     | 0,05         | 0           | -0,1659    | 0,12038    |

\*Sig equals 1 indicates that the difference of the means is significant at the 0.05 level. Sig equals 0 indicates that the difference of the means is not significant at the 0.05 level.

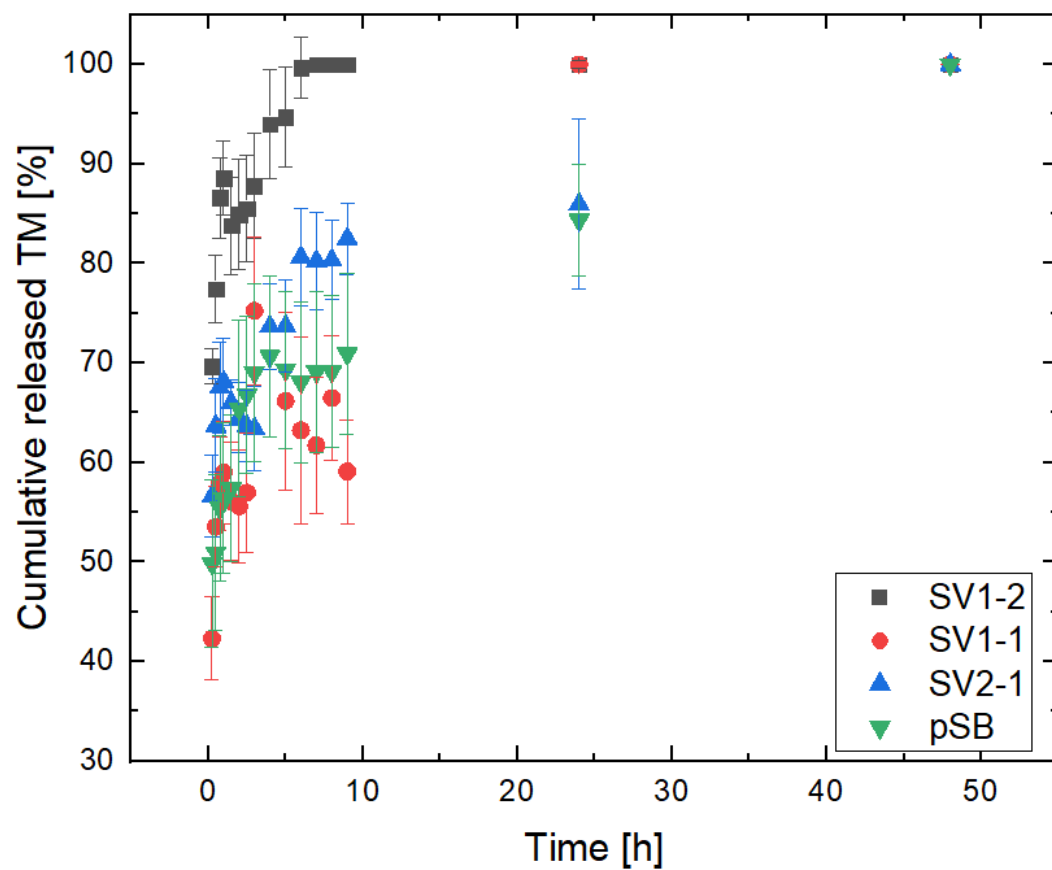

**Figure S2.** Release profiles of TM from the copolymeric hydrogels for 48 h.

## Statistical analysis for TM release from pSB-co-pVP hydrogels

One-way ANOVA and Tukey test were performed using OriginPro 2018 software (OriginLab Corporation, [www.originlab.com](http://www.originlab.com)).

The ANOVA tests were applied for two points from each TM release curve, obtained for the different copolymeric hydrogels, which points differed most significantly in their cumulative released TM. The points are designated in Figure S4 by ellipses, using the colour which was used for the entire respective curve.

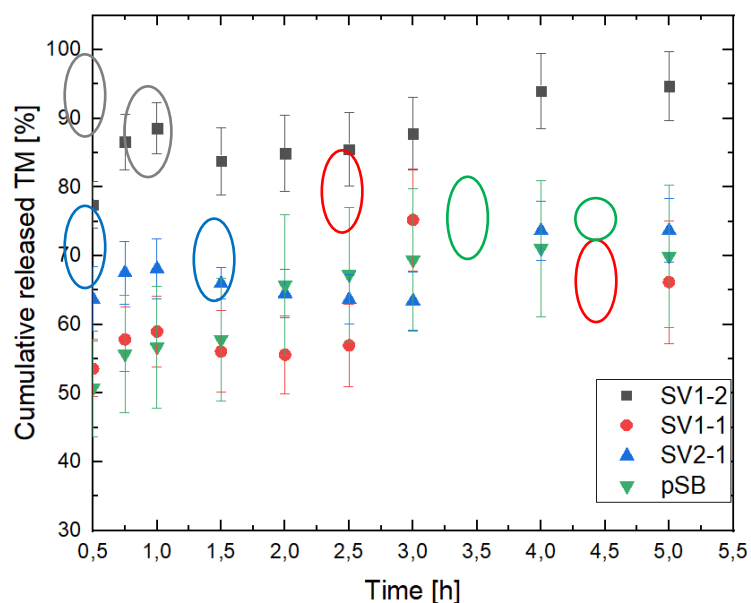

**Figure S3.** Release profiles of TM from hydrogels in the range from the 30 minutes to the 5<sup>th</sup> hour, where a plateau was observed.

**Table S6.** ANOVA analysis for both points from the TM release curve obtained for SV1-2 sample, which are designated in black ellipses in Figure S4.

|       | DF | Sum of Squares | Mean Square | F Value | Prob>F |
|-------|----|----------------|-------------|---------|--------|
| Model | 1  | 33,90301       | 33,90301    | 0,59625 | 0,4831 |
| Error | 4  | 227,44078      | 56,8602     |         |        |
| Total | 5  | 261,34379      |             |         |        |

The direct comparison of the points where possible decrease in the drug release is detected for SV1-2 sample, using ANOVA test, indicates that no statistically significant difference between both points is detected. That means that within the experimental error these two points from the TM release curve for SV1-2 sample are similar and no real decrease exists.

**Table S7.** ANOVA analysis for both points from the TM release curve obtained for SV1-1 sample, which are designated in red ellipses in Figure S4.

|       | <b>DF</b> | <b>Sum of Squares</b> | <b>Mean Square</b> | <b>F Value</b> | <b>Prob&gt;F</b> |
|-------|-----------|-----------------------|--------------------|----------------|------------------|
| Model | 1         | 123,21959             | 123,21959          | 0,61215        | 0,47771          |
| Error | 4         | 805,16478             | 201,29119          |                |                  |
| Total | 5         | 928,38437             |                    |                |                  |

The direct comparison of the points where possible decrease in the drug release is detected for the TM release plateau obtained for SV1-1 sample, using ANOVA test, indicates that no statistically significant difference between both points is detected. That means that within the experimental error these two points from the TM release curve for SV1-1 sample are similar and no real decrease exists.

**Table S8.** ANOVA analysis for both points from the TM release curve obtained for SV2-1 sample, which are designated in blue ellipses in Figure S4.

|       | <b>DF</b> | <b>Sum of Squares</b> | <b>Mean Square</b> | <b>F Value</b> | <b>Prob&gt;F</b> |
|-------|-----------|-----------------------|--------------------|----------------|------------------|
| Model | 1         | 32,93858              | 32,93858           | 0,58538        | 0,48686          |
| Error | 4         | 225,07561             | 56,2689            |                |                  |
| Total | 5         | 258,01419             |                    |                |                  |

The direct comparison of the points where possible decrease in the drug release is detected in the TM release profile from SV2-2 sample, using ANOVA test, indicates that no statistically significant difference between both points is detected. That means that within the experimental error these two points from the TM release curve for SV2-1 sample are similar.

We have also analyzed the plateau observed for the TM release from the neat pSB and the results are presented in Table S6.

**Table S9.** ANOVA analysis for both points from the TM release curve obtained for pSB sample, which are designated in green ellipses in Figure S4.

|       | <b>DF</b> | <b>Sum of Squares</b> | <b>Mean Square</b> | <b>F Value</b> | <b>Prob&gt;F</b> |
|-------|-----------|-----------------------|--------------------|----------------|------------------|
| Model | 1         | 2,02747               | 2,02747            | 0,0066         | 0,93916          |
| Error | 4         | 1228,93632            | 307,23408          |                |                  |
| Total | 5         | 1230,96379            |                    |                |                  |

The performed ANOVA indicates that a decrease in the amount of drug released was not actually observed also for the TM release from the neat pSB hydrogel.

Tukey post hoc test also confirmed that there is no significant difference between each two analyzed points, at 0.05 significance level.

**Table S10.** Tukey post hoc test.

|       | <b>MeanDiff</b> | <b>SEM</b> | <b>q Value</b> | <b>Prob</b> | <b>Alpha</b> | <b>Sig*</b> | <b>LCL</b> | <b>UCL</b> |
|-------|-----------------|------------|----------------|-------------|--------------|-------------|------------|------------|
| SV1-2 | -4,75416        | 6,15685    | 1,09202        | 0,4831      | 0,05         | 0           | -21,84813  | 12,33982   |
| SV1-1 | -9,06346        | 11,58422   | 1,10648        | 0,47771     | 0,05         | 0           | -41,22607  | 23,09914   |
| SV2-1 | -4,68605        | 6,12475    | 1,08201        | 0,48686     | 0,05         | 0           | -21,69091  | 12,31881   |
| pSB   | -1,1626         | 14,31163   | 0,11488        | 0,93916     | 0,05         | 0           | -40,89763  | 38,57242   |

\*Sig equals 1 indicates that the difference in the means is significant at the 0.05 level. Sig equals 0 indicates that the difference of the means is not significant at the 0.05 level.



***Differential scanning calorimetry (DSC) of TM-loaded pSB-co-pVP networks***

**Table S11.** Glass transition temperatures of non-drug-loaded and TM-loaded pSB-co-pVP networks (determined from Figure S1).

| Sample | Tg of non-loaded samples<br>[°C] | Tg of loaded samples<br>[°C] |
|--------|----------------------------------|------------------------------|
| SV1-2  | 18.67 °C                         | 17.54 °C                     |
| SV1-1  | 17.23 °C                         | 17.75 °C                     |
| SV2-1  | 18.26 °C                         | 16.87 °C                     |
| pSB    | 16.66 °C                         | 18.05 °C                     |

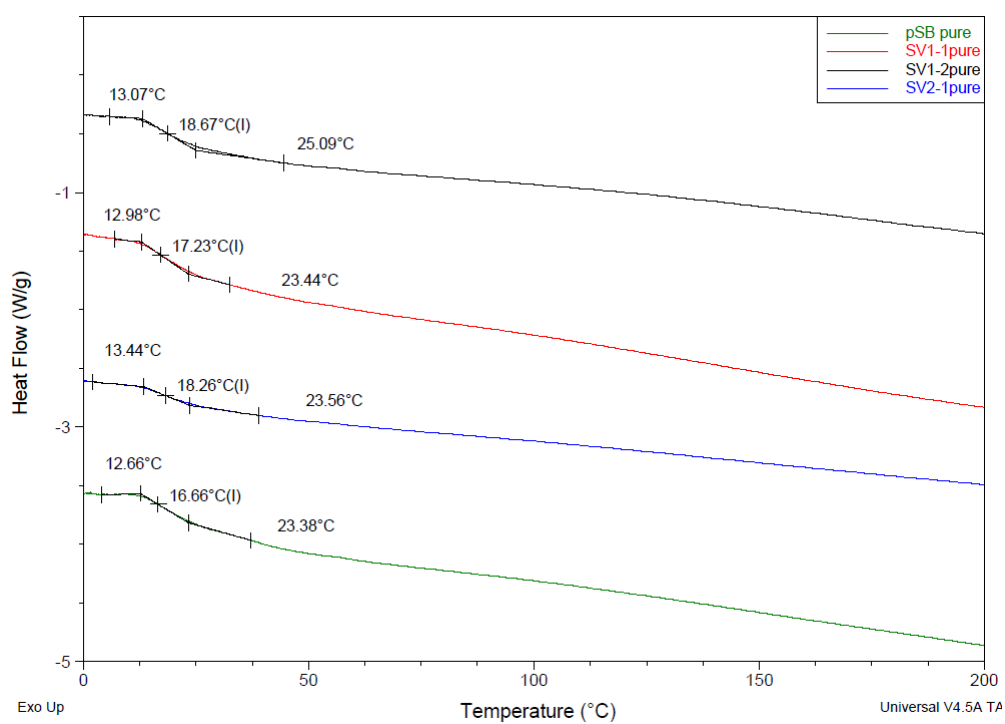

**Figure S4.** DSC thermograms (2<sup>nd</sup> heating run) for neat copolymeric networks as well as for the neat pSB network.

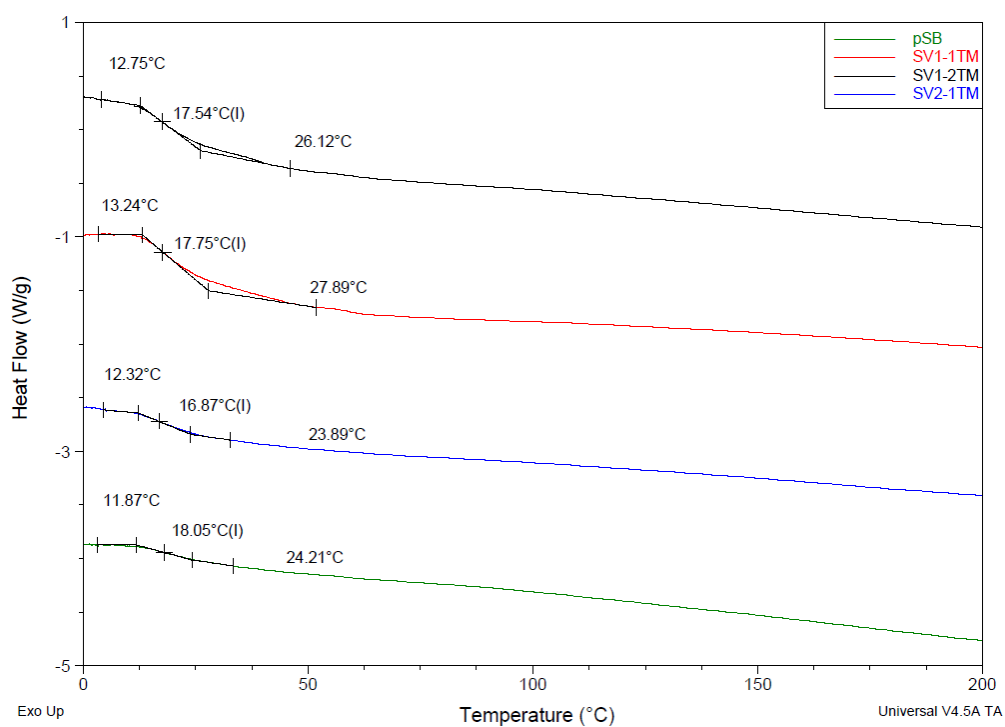

**Figure S5.** DSC thermograms (2<sup>nd</sup> heating run) for TM loaded copolymeric networks as well as for TM loaded pSB network.

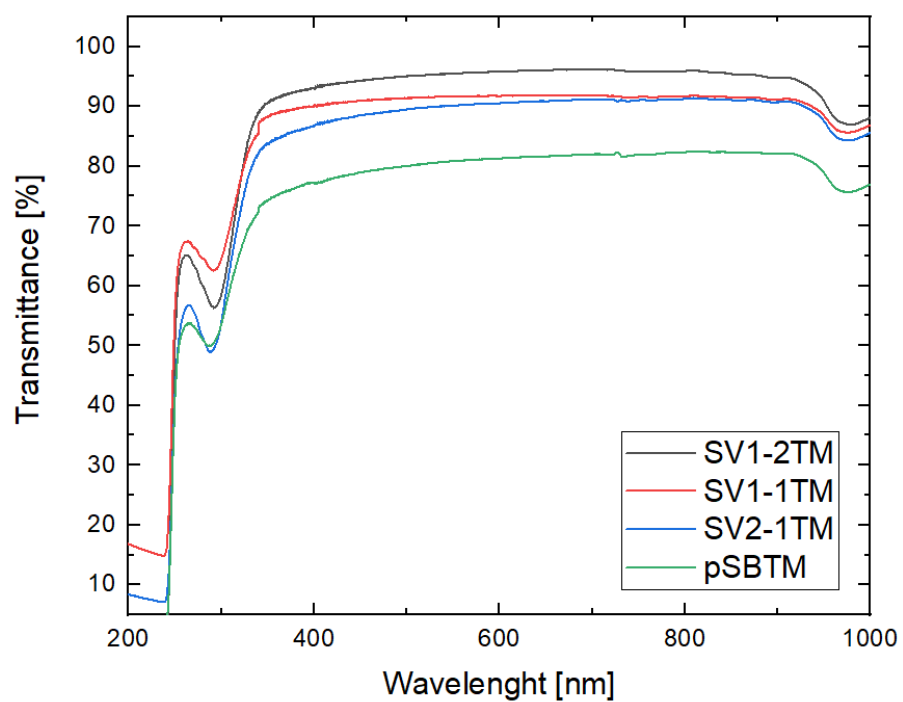

**Figure S6.** Transmittance spectra of TM loaded hydrogels after 5h drug release at 37 °C in PBS.

### Light transmittance of TM-loaded pSB hydrogel

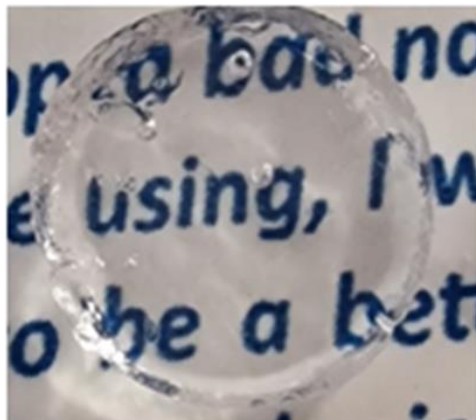

**Figure S7.** Photographic image of TM-loaded pSB hydrogel.

The bubbles appearance in the neat pSB could be avoided by a step of degassing, e.g. via purging nitrogen flow, which is also the approach used for soft contact lenses production from other polymers, e.g. silicon based.

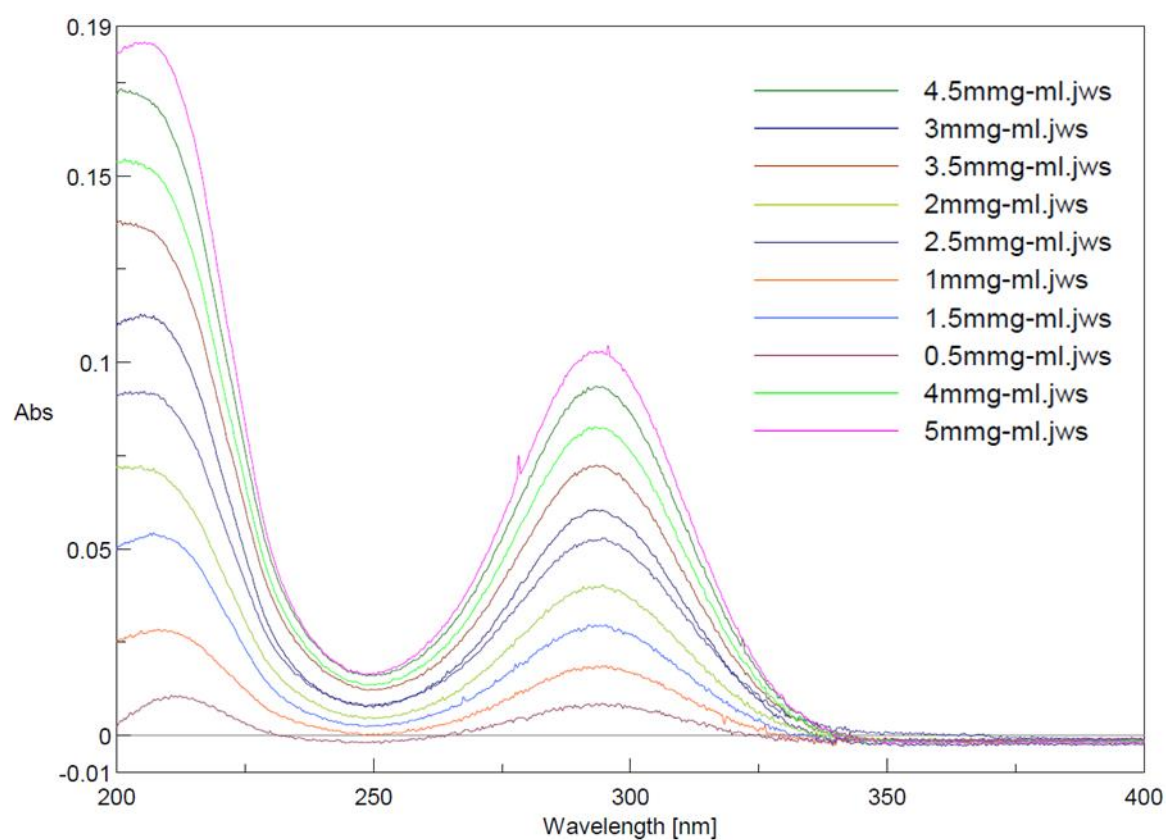

**Figure S8.** UV spectra of timolol maleate aqueous solutions, used for the preparation of the calibration curve. All spectra have maximum at 294 nm.
